# Supplementary material for: A new ratiometric and colorimetric chemosensor for cyanide anion based on Coumarin–hemicyanine hybrid
Source: Royal Society of Chemistry journal article supplement (doi:10.1039/c2ob25516b), 2012-01-01
Supplement: c2ob25516b.pdf [file c2ob25516b.pdf]

## Supporting Information

for

### A New Ratiometric and Colorimetric Chemosensor for Cyanide

#### Anion based on Coumarin-hemicyanine Hybrid

Zhenghao Yang,<sup>a</sup> Zhipeng Liu,<sup>\*a,b</sup> Yuncong Chen,<sup>b</sup> Xiaoqing Wang,<sup>c</sup> Weijiang He<sup>\*b</sup> and Yi Lu<sup>d</sup>

- State Key Laboratory of Coordination Chemistry, Coordination Chemistry Institute, School of Chemistry and Chemical Engineering, Nanjing University, Nanjing 210093, P.R. China.
- Shandong Provincial Key Laboratory of Chemical Energy Storage and Novel Cell Technology, School of Chemistry and Chemical Engineering, Liaocheng University, Liaocheng 252000, P.R. China.
- School of Material Science and Engineering, Liaocheng University, Liaocheng 252000, P.R. China.
- Department of Chemistry, Beckman Institute for Advanced Science and Technology, University of Illinois at Urbana-Champaign, Urbana, IL 61801, USA.

Email: chliuzp@163.com; hewej69@nju.edu.cn

#### 1. <sup>1</sup>H NMR and ESI-MS Spectra of Cou-BT.

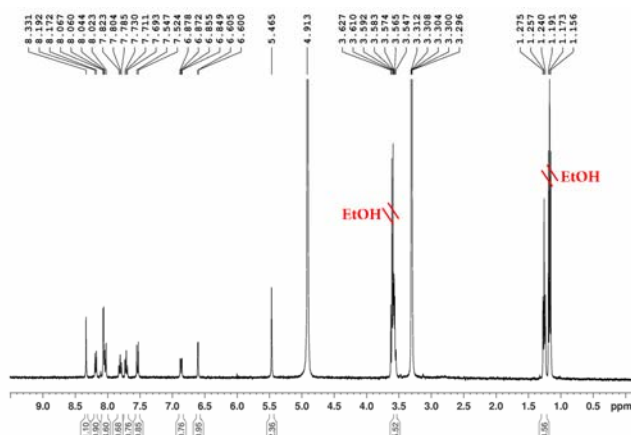

Figure S1. <sup>1</sup>H NMR spectrum of Cou-BT.

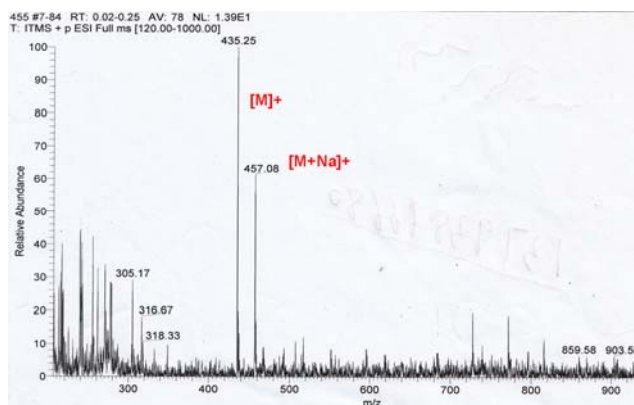

Figure S2. ESI-MS spectrum of Cou-BT.

## 2. Simulated UV-Vis absorption spectra for Cou-BT and Cou-BT-CN.

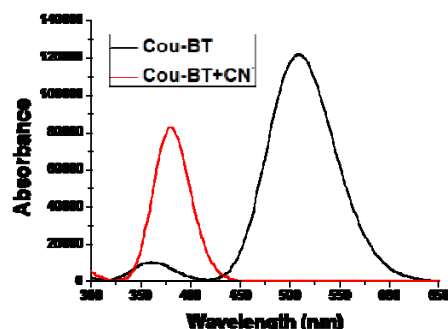

Figure S3. Simulated UV-Vis absorption spectra for Cou-BT and Cou-BT-CN.

## 3. Z-matrix and total energy of Cou-BT and Cou-BT-CN

### Cou-BT (TDDFT B3LYP 6-31G(d,p))

Symbolic Z-matrix:

Charge = 1 Multiplicity = 1

|   |    |     |    |     |   |     |   |
|---|----|-----|----|-----|---|-----|---|
| C |    |     |    |     |   |     |   |
| C | 1  | B1  |    |     |   |     |   |
| C | 2  | B2  | 1  | A1  |   |     |   |
| C | 3  | B3  | 2  | A2  | 1 | D1  | 0 |
| C | 4  | B4  | 3  | A3  | 2 | D2  | 0 |
| C | 5  | B5  | 4  | A4  | 3 | D3  | 0 |
| H | 3  | B6  | 2  | A5  | 1 | D4  | 0 |
| H | 1  | B7  | 2  | A6  | 3 | D5  | 0 |
| H | 2  | B8  | 1  | A7  | 6 | D6  | 0 |
| C | 3  | B9  | 2  | A8  | 1 | D7  | 0 |
| H | 5  | B10 | 4  | A9  | 3 | D8  | 0 |
| C | 4  | B11 | 3  | A10 | 2 | D9  | 0 |
| C | 10 | B12 | 3  | A11 | 2 | D10 | 0 |
| C | 6  | B13 | 5  | A12 | 4 | D11 | 0 |
| C | 14 | B14 | 6  | A13 | 5 | D12 | 0 |
| H | 14 | B15 | 6  | A14 | 5 | D13 | 0 |
| H | 14 | B16 | 6  | A15 | 5 | D14 | 0 |
| H | 15 | B17 | 14 | A16 | 6 | D15 | 0 |
| H | 15 | B18 | 14 | A17 | 6 | D16 | 0 |
| H | 15 | B19 | 14 | A18 | 6 | D17 | 0 |
| C | 6  | B20 | 5  | A19 | 4 | D18 | 0 |
| C | 21 | B21 | 6  | A20 | 5 | D19 | 0 |
| H | 21 | B22 | 6  | A21 | 5 | D20 | 0 |
| H | 21 | B23 | 6  | A22 | 5 | D21 | 0 |
| H | 22 | B24 | 21 | A23 | 6 | D22 | 0 |
| H | 22 | B25 | 21 | A24 | 6 | D23 | 0 |

|   |    |     |    |     |    |     |   |
|---|----|-----|----|-----|----|-----|---|
| H | 22 | B26 | 21 | A25 | 6  | D24 | 0 |
| N | 6  | B27 | 5  | A26 | 4  | D25 | 0 |
| O | 4  | B28 | 3  | A27 | 2  | D26 | 0 |
| O | 12 | B29 | 4  | A28 | 3  | D27 | 0 |
| C | 13 | B30 | 10 | A29 | 3  | D28 | 0 |
| C | 31 | B31 | 13 | A30 | 10 | D29 | 0 |
| H | 31 | B32 | 13 | A31 | 10 | D30 | 0 |
| H | 32 | B33 | 31 | A32 | 13 | D31 | 0 |
| C | 32 | B34 | 31 | A33 | 13 | D32 | 0 |
| C | 35 | B35 | 32 | A34 | 31 | D33 | 0 |
| C | 36 | B36 | 35 | A35 | 32 | D34 | 0 |
| C | 36 | B37 | 35 | A36 | 32 | D35 | 0 |
| C | 37 | B38 | 36 | A37 | 35 | D36 | 0 |
| C | 38 | B39 | 36 | A38 | 35 | D37 | 0 |
| H | 38 | B40 | 36 | A39 | 35 | D38 | 0 |
| C | 39 | B41 | 37 | A40 | 36 | D39 | 0 |
| H | 39 | B42 | 37 | A41 | 36 | D40 | 0 |
| H | 40 | B43 | 38 | A42 | 36 | D41 | 0 |
| H | 42 | B44 | 39 | A43 | 37 | D42 | 0 |
| S | 35 | B45 | 32 | A44 | 31 | D43 | 0 |
| C | 35 | B46 | 32 | A45 | 31 | D44 | 0 |
| H | 47 | B47 | 35 | A46 | 32 | D45 | 0 |
| H | 47 | B48 | 35 | A47 | 32 | D46 | 0 |
| C | 47 | B49 | 35 | A48 | 32 | D47 | 0 |
| O | 50 | B50 | 47 | A49 | 35 | D48 | 0 |
| O | 50 | B51 | 47 | A50 | 35 | D49 | 0 |
| H | 52 | B52 | 50 | A51 | 47 | D50 | 0 |
| N | 35 | B53 | 32 | A52 | 31 | D51 | 0 |

Variables:

|     |         |
|-----|---------|
| B1  | 1.36992 |
| B2  | 1.42309 |
| B3  | 1.42184 |
| B4  | 1.37787 |
| B5  | 1.42446 |
| B6  | 2.14712 |
| B7  | 1.08125 |
| B8  | 1.08701 |
| B9  | 1.39843 |
| B10 | 1.08107 |
| B11 | 2.42939 |
| B12 | 1.39714 |
| B13 | 2.47025 |
| B14 | 1.53408 |
| B15 | 1.09307 |

|     |           |
|-----|-----------|
| B16 | 1.09464   |
| B17 | 1.09594   |
| B18 | 1.09446   |
| B19 | 1.0948    |
| B20 | 2.47603   |
| B21 | 1.53395   |
| B22 | 1.09442   |
| B23 | 1.09295   |
| B24 | 1.09602   |
| B25 | 1.09496   |
| B26 | 1.09441   |
| B27 | 1.35942   |
| B28 | 1.36512   |
| B29 | 1.213     |
| B30 | 1.42485   |
| B31 | 1.37707   |
| B32 | 1.09071   |
| B33 | 1.08152   |
| B34 | 1.41433   |
| B35 | 2.33027   |
| B36 | 1.40362   |
| B37 | 1.39903   |
| B38 | 1.39479   |
| B39 | 1.39371   |
| B40 | 1.08459   |
| B41 | 1.39431   |
| B42 | 1.08553   |
| B43 | 1.08554   |
| B44 | 1.08552   |
| B45 | 1.74696   |
| B46 | 2.47608   |
| B47 | 1.09185   |
| B48 | 1.0926    |
| B49 | 1.53101   |
| B50 | 1.20649   |
| B51 | 1.34359   |
| B52 | 0.97737   |
| B53 | 1.35813   |
| A1  | 121.62605 |
| A2  | 116.70312 |
| A3  | 122.79781 |
| A4  | 120.17461 |
| A5  | 98.67444  |
| A6  | 118.50313 |

|     |           |
|-----|-----------|
| A7  | 119.5691  |
| A8  | 125.05628 |
| A9  | 117.61882 |
| A10 | 91.76945  |
| A11 | 122.31092 |
| A12 | 90.68537  |
| A13 | 107.85747 |
| A14 | 131.8672  |
| A15 | 87.28512  |
| A16 | 109.47877 |
| A17 | 111.29031 |
| A18 | 111.90503 |
| A19 | 151.87405 |
| A20 | 107.74642 |
| A21 | 87.88873  |
| A22 | 131.72494 |
| A23 | 109.47471 |
| A24 | 111.89598 |
| A25 | 111.34024 |
| A26 | 121.3939  |
| A27 | 120.07582 |
| A28 | 144.53322 |
| A29 | 120.01535 |
| A30 | 127.32719 |
| A31 | 114.13561 |
| A32 | 117.64771 |
| A33 | 123.7769  |
| A34 | 157.26574 |
| A35 | 80.14206  |
| A36 | 159.46245 |
| A37 | 121.51421 |
| A38 | 118.11755 |
| A39 | 121.88702 |
| A40 | 117.96334 |
| A41 | 121.04314 |
| A42 | 119.06491 |
| A43 | 119.488   |
| A44 | 124.68707 |
| A45 | 94.58935  |
| A46 | 132.52262 |
| A47 | 87.642    |
| A48 | 107.2906  |
| A49 | 124.87572 |
| A50 | 109.60209 |

|     |            |
|-----|------------|
| A51 | 108.75842  |
| A52 | 124.14865  |
| D1  | 0.26959    |
| D2  | -0.20767   |
| D3  | -0.6312    |
| D4  | -179.70897 |
| D5  | -179.37645 |
| D6  | -179.65731 |
| D7  | -179.80151 |
| D8  | 179.11729  |
| D9  | 179.78687  |
| D10 | 179.96505  |
| D11 | -178.52808 |
| D12 | -71.89338  |
| D13 | 148.2065   |
| D14 | 39.02913   |
| D15 | 149.46136  |
| D16 | -91.30195  |
| D17 | 29.70523   |
| D18 | -179.01391 |
| D19 | -107.70842 |
| D20 | 141.15847  |
| D21 | 31.62079   |
| D22 | -149.80759 |
| D23 | -30.00706  |
| D24 | 90.95167   |
| D25 | -178.12401 |
| D26 | 179.51142  |
| D27 | -179.57546 |
| D28 | -179.47782 |
| D29 | 179.26666  |
| D30 | -0.48284   |
| D31 | -0.62807   |
| D32 | -179.45104 |
| D33 | 179.1778   |
| D34 | -177.59201 |
| D35 | -0.06581   |
| D36 | 179.60716  |
| D37 | -177.69265 |
| D38 | 1.55949    |
| D39 | -0.26937   |
| D40 | 179.96228  |
| D41 | 179.82675  |
| D42 | -179.85867 |

|     |            |
|-----|------------|
| D43 | 2.12142    |
| D44 | -178.34724 |
| D45 | 142.93736  |
| D46 | 32.9457    |
| D47 | -76.762    |
| D48 | -23.54632  |
| D49 | 156.16694  |
| D50 | -178.34298 |
| D51 | -177.85293 |

SCF Done: E(RB+HF-LYP) = -1736.8613626 a.u.

Number of Imaginary frequencies: n.a.

### **Cou-BT-CN<sup>-</sup> (TDDFT B3LYP 6-31G(d,p))**

Symbolic Z-matrix:

Charge = 0 Multiplicity = 1

C

|   |    |     |    |     |   |     |   |
|---|----|-----|----|-----|---|-----|---|
| C | 1  | B1  |    |     |   |     |   |
| C | 2  | B2  | 1  | A1  |   |     |   |
| C | 3  | B3  | 2  | A2  | 1 | D1  | 0 |
| C | 4  | B4  | 3  | A3  | 2 | D2  | 0 |
| C | 5  | B5  | 4  | A4  | 3 | D3  | 0 |
| H | 3  | B6  | 2  | A5  | 1 | D4  | 0 |
| H | 1  | B7  | 2  | A6  | 3 | D5  | 0 |
| H | 2  | B8  | 1  | A7  | 6 | D6  | 0 |
| C | 3  | B9  | 2  | A8  | 1 | D7  | 0 |
| H | 5  | B10 | 4  | A9  | 3 | D8  | 0 |
| C | 4  | B11 | 3  | A10 | 2 | D9  | 0 |
| C | 10 | B12 | 3  | A11 | 2 | D10 | 0 |
| C | 6  | B13 | 5  | A12 | 4 | D11 | 0 |
| C | 14 | B14 | 6  | A13 | 5 | D12 | 0 |
| H | 14 | B15 | 6  | A14 | 5 | D13 | 0 |
| H | 14 | B16 | 6  | A15 | 5 | D14 | 0 |
| H | 15 | B17 | 14 | A16 | 6 | D15 | 0 |
| H | 15 | B18 | 14 | A17 | 6 | D16 | 0 |
| H | 15 | B19 | 14 | A18 | 6 | D17 | 0 |
| C | 6  | B20 | 5  | A19 | 4 | D18 | 0 |
| C | 21 | B21 | 6  | A20 | 5 | D19 | 0 |
| H | 21 | B22 | 6  | A21 | 5 | D20 | 0 |
| H | 21 | B23 | 6  | A22 | 5 | D21 | 0 |
| H | 22 | B24 | 21 | A23 | 6 | D22 | 0 |
| H | 22 | B25 | 21 | A24 | 6 | D23 | 0 |
| H | 22 | B26 | 21 | A25 | 6 | D24 | 0 |
| N | 6  | B27 | 5  | A26 | 4 | D25 | 0 |
| O | 4  | B28 | 3  | A27 | 2 | D26 | 0 |

|   |    |     |    |     |    |     |   |
|---|----|-----|----|-----|----|-----|---|
| O | 12 | B29 | 4  | A28 | 3  | D27 | 0 |
| C | 13 | B30 | 10 | A29 | 3  | D28 | 0 |
| C | 31 | B31 | 13 | A30 | 10 | D29 | 0 |
| H | 31 | B32 | 13 | A31 | 10 | D30 | 0 |
| H | 32 | B33 | 31 | A32 | 13 | D31 | 0 |
| C | 32 | B34 | 31 | A33 | 13 | D32 | 0 |
| C | 35 | B35 | 32 | A34 | 31 | D33 | 0 |
| C | 35 | B36 | 32 | A35 | 31 | D34 | 0 |
| C | 36 | B37 | 35 | A36 | 32 | D35 | 0 |
| C | 37 | B38 | 35 | A37 | 32 | D36 | 0 |
| H | 37 | B39 | 35 | A38 | 32 | D37 | 0 |
| C | 39 | B40 | 37 | A39 | 35 | D38 | 0 |
| H | 38 | B41 | 36 | A40 | 35 | D39 | 0 |
| H | 39 | B42 | 37 | A41 | 35 | D40 | 0 |
| H | 41 | B43 | 39 | A42 | 37 | D41 | 0 |
| S | 36 | B44 | 35 | A43 | 32 | D42 | 0 |
| C | 35 | B45 | 32 | A44 | 31 | D43 | 0 |
| H | 46 | B46 | 35 | A45 | 32 | D44 | 0 |
| H | 46 | B47 | 35 | A46 | 32 | D45 | 0 |
| C | 46 | B48 | 35 | A47 | 32 | D46 | 0 |
| O | 49 | B49 | 46 | A48 | 35 | D47 | 0 |
| O | 49 | B50 | 46 | A49 | 35 | D48 | 0 |
| H | 51 | B51 | 49 | A50 | 46 | D49 | 0 |
| N | 35 | B52 | 32 | A51 | 31 | D50 | 0 |
| C | 53 | B53 | 35 | A52 | 32 | D51 | 0 |
| N | 54 | B54 | 53 | A53 | 35 | D52 | 0 |
| C | 53 | B55 | 35 | A54 | 32 | D53 | 0 |

Variables:

|     |         |
|-----|---------|
| B1  | 1.37991 |
| B2  | 1.4122  |
| B3  | 1.40968 |
| B4  | 1.38737 |
| B5  | 1.41558 |
| B6  | 2.16331 |
| B7  | 1.08203 |
| B8  | 1.08758 |
| B9  | 1.42127 |
| B10 | 1.08153 |
| B11 | 2.43498 |
| B12 | 1.37528 |
| B13 | 2.4756  |
| B14 | 1.53582 |
| B15 | 1.09463 |
| B16 | 1.09612 |



|     |           |
|-----|-----------|
| B17 | 1.0969    |
| B18 | 1.09524   |
| B19 | 1.09475   |
| B20 | 2.48013   |
| B21 | 1.53581   |
| B22 | 1.09596   |
| B23 | 1.09472   |
| B24 | 1.09706   |
| B25 | 1.09497   |
| B26 | 1.09512   |
| B27 | 1.37834   |
| B28 | 1.36494   |
| B29 | 1.21215   |
| B30 | 1.45875   |
| B31 | 1.34778   |
| B32 | 1.09015   |
| B33 | 1.08451   |
| B34 | 3.65733   |
| B35 | 1.4066    |
| B36 | 1.39524   |
| B37 | 1.38794   |
| B38 | 1.40244   |
| B39 | 1.08547   |
| B40 | 1.39459   |
| B41 | 1.08646   |
| B42 | 1.08657   |
| B43 | 1.0862    |
| B44 | 1.7797    |
| B45 | 2.47835   |
| B46 | 1.10057   |
| B47 | 1.09521   |
| B48 | 1.52678   |
| B49 | 1.20636   |
| B50 | 1.35941   |
| B51 | 0.97589   |
| B52 | 1.4029    |
| B53 | 2.42909   |
| B54 | 1.16247   |
| B55 | 1.47112   |
| A1  | 121.69603 |
| A2  | 116.72654 |
| A3  | 122.77043 |
| A4  | 120.2437  |
| A5  | 99.10701  |

|     |           |
|-----|-----------|
| A6  | 118.33146 |
| A7  | 119.36686 |
| A8  | 125.39035 |
| A9  | 117.33553 |
| A10 | 91.70043  |
| A11 | 122.5805  |
| A12 | 90.81654  |
| A13 | 107.81445 |
| A14 | 132.63898 |
| A15 | 87.29691  |
| A16 | 109.84292 |
| A17 | 111.21361 |
| A18 | 111.64371 |
| A19 | 151.65738 |
| A20 | 108.02701 |
| A21 | 87.57537  |
| A22 | 132.3686  |
| A23 | 109.91801 |
| A24 | 111.57702 |
| A25 | 111.21047 |
| A26 | 121.34401 |
| A27 | 120.169   |
| A28 | 144.25989 |
| A29 | 119.78491 |
| A30 | 128.36392 |
| A31 | 113.35376 |
| A32 | 122.00441 |
| A33 | 147.76277 |
| A34 | 88.05165  |
| A35 | 151.95375 |
| A36 | 121.3856  |
| A37 | 119.0917  |
| A38 | 121.05846 |
| A39 | 120.99209 |
| A40 | 120.50225 |
| A41 | 119.02729 |
| A42 | 120.31858 |
| A43 | 111.28091 |
| A44 | 55.81597  |
| A45 | 90.25434  |
| A46 | 135.9809  |
| A47 | 105.82633 |
| A48 | 127.01229 |
| A49 | 109.61362 |

|     |            |
|-----|------------|
| A50 | 107.2348   |
| A51 | 25.87237   |
| A52 | 107.02792  |
| A53 | 143.50548  |
| A54 | 113.45143  |
| D1  | 0.17952    |
| D2  | -0.10348   |
| D3  | -0.6735    |
| D4  | 179.97869  |
| D5  | -179.28899 |
| D6  | -179.73521 |
| D7  | 179.85583  |
| D8  | 179.16076  |
| D9  | 179.71687  |
| D10 | -179.9742  |
| D11 | -178.75172 |
| D12 | -71.48117  |
| D13 | 148.12337  |
| D14 | 38.88003   |
| D15 | 148.04519  |
| D16 | -92.43798  |
| D17 | 28.21025   |
| D18 | -178.69035 |
| D19 | -108.29749 |
| D20 | 141.21704  |
| D21 | 31.95845   |
| D22 | -148.35514 |
| D23 | -28.38722  |
| D24 | 92.09178   |
| D25 | -178.05863 |
| D26 | 179.55519  |
| D27 | -179.63213 |
| D28 | -179.68696 |
| D29 | 177.6916   |
| D30 | -1.9116    |
| D31 | -0.19683   |
| D32 | 164.98044  |
| D33 | 97.87643   |
| D34 | -91.15949  |
| D35 | 174.92041  |
| D36 | -169.1568  |
| D37 | 9.90734    |
| D38 | -0.29297   |
| D39 | 179.60187  |

|     |            |
|-----|------------|
| D40 | 179.86851  |
| D41 | -179.71585 |
| D42 | -3.5282    |
| D43 | -73.70257  |
| D44 | 139.99898  |
| D45 | 25.81351   |
| D46 | -110.37766 |
| D47 | 36.81034   |
| D48 | -143.70741 |
| D49 | -178.02165 |
| D50 | -75.08313  |
| D51 | 65.13051   |
| D52 | 75.92974   |
| D53 | 28.23357   |

SCF Done: E(RB+HF-LYP) = -1829.8792918 a.u.

Number of Imaginary frequencies: n.a.
